# Supplementary material for: PLGA-PEG-ANG-2 Nanoparticles for Blood–Brain Barrier Crossing: Proof-of-Concept Study
Source: MDPI journal article supplement (doi:10.3390/pharmaceutics12010072), 2020-01-17
Supplement: s1 [file s1]

# Supplementary Materials: PLGA-PEG-ANG-2 Nanoparticles for Blood–Brain Barrier Crossing: Proof-of-Concept Study

Gina P. Hoyos-Ceballos, Barbara Ruozzi, Ilaria Ottonelli, Federica Da Ros, Maria Angela Vandelli, Flavio Forni, Eleonora Daini, Antonietta Vilella, Michele Zoli, Giovanni Tosi, Jason T. Duskey and Betty L. López-Osorio

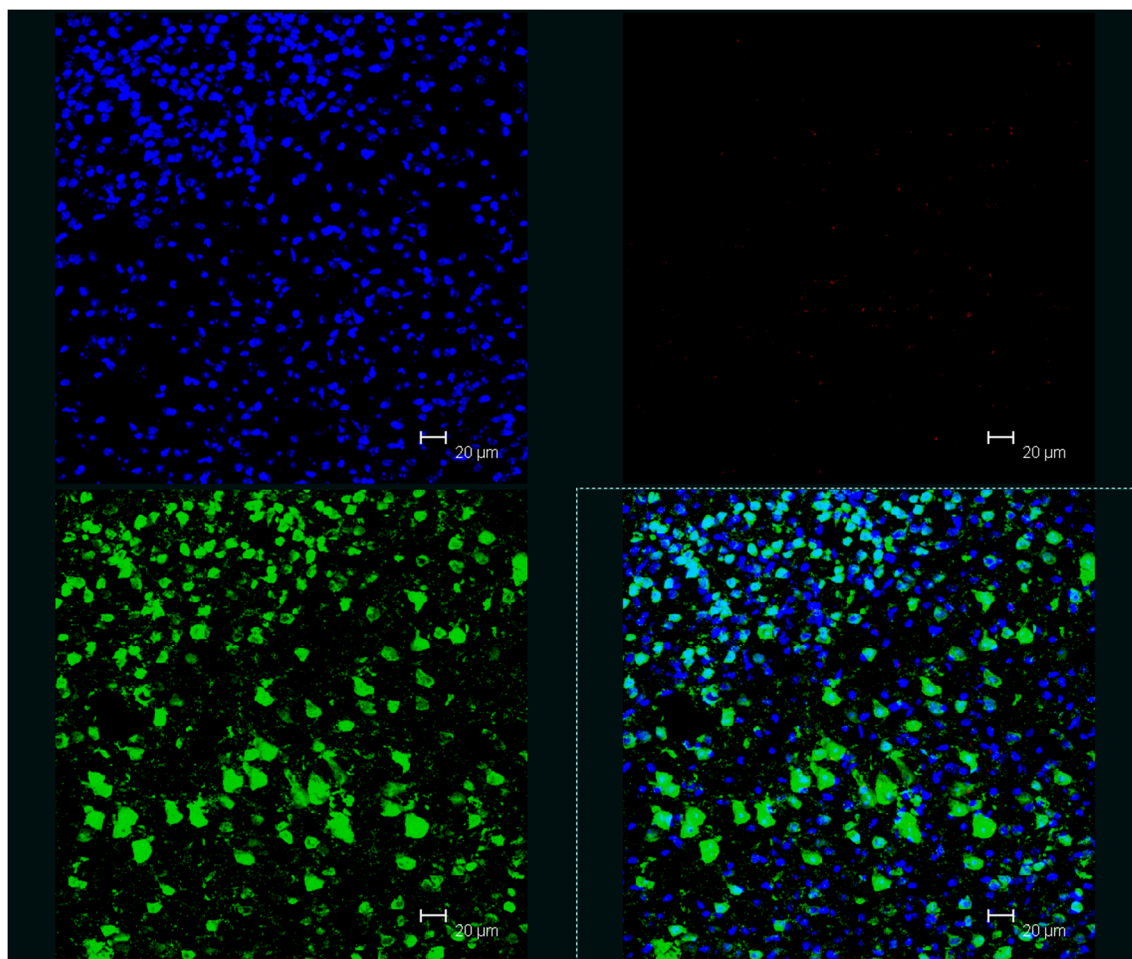

**Figure S1.** Fluorescent microscopy analysis of non-functionalized NP brain distribution. Staining with DAPI (blue channel), Cy5 fluorescence (red channel), and NEUN (green channel).
